# Supplementary material
Source: PubMed Central journal article supplement (PMC4860082)
Supplement: NIHMS748473-supplement-Supplemental_Data_File___doc___tif__pdf__etc__.pdf [file NIHMS748473-supplement-Supplemental_Data_File___doc___tif__pdf__etc__.pdf]

| Group   | Case | Age (y) | Gender | Operated Eye | FCT wetting length (mm) |                  | Ocular Symptoms                                       |             | corneal staining |      | conjunctival inflammation |      | Concomitant topical medications |      |
|---------|------|---------|--------|--------------|-------------------------|------------------|-------------------------------------------------------|-------------|------------------|------|---------------------------|------|---------------------------------|------|
|         |      |         |        |              | Pre                     | Post             | Pre                                                   | Post        | Pre              | Post | Pre                       | Post | Pre                             | Post |
| CCH+ATD | 1    | 63      | F      | OD           | 0                       | 7                | irr, pho, it                                          | pho         | 2                | 2    | 2                         | 1    | 1                               | 1    |
|         | 2    | 56      | F      | OD           | 2                       | 5                | dry, BV, pa, pho, bu                                  | dry, pa, bu | 0                | 0    | 1                         | 1    | 1                               | 0    |
|         | 3    | 77      | F      | OD           | 1                       | 13               | dry, irr, pho, bu, it                                 | it          | 1                | 0    | 1                         | 0    | 1                               | 0    |
|         | 4    | 76      | F      | OD           | 2                       | 8                | irr, pa, pho, mu, fat                                 | -           | 2                | 1    | 3                         | 2    | 2                               | 2    |
|         | 5    | 53      | F      | OD           | 0                       | 5                | dry, irr, pho, fat, cr                                | cr          | 1                | 0    | 1                         | 1    | 4                               | 2    |
|         | 6    | 65      | F      | OD           | 0                       | 4                | dry, irr, pho, fat, cr                                | cr          | 1                | 0    | 1                         | 1    | 4                               | 2    |
|         | 7    | 62      | M      | OS           | 1                       | 6                | dry, irr, BV, pa, pho, bu, dry, irr, BV, pa, pho, bu, | -           | 0                | 0    | 2                         | 2    | 2                               | 1    |
|         | 8    | 63      | M      | OD           | 2                       | 4                | irr, pho                                              | -           | 1                | 0    | 2                         | 1    | 1                               | 2    |
|         | 9    | 90      | M      | OD           | 2                       | 4                | irr, pho                                              | -           | 1                | 0    | 2                         | 1    | 1                               | 1    |
|         | 10   | 61      | F      | OS           | 0                       | 2                | dry, pa, mu, cr                                       | wa          | 1                | 0    | 2                         | 0    | 3                               | 2    |
|         | 11   | 71      | M      | OS           | 0                       | 0                | dry, irr, BV, wa, pa, pho, bu, cr                     | irr         | 1                | 0    | 1                         | 1    | 1                               | 1    |
|         | 12   | 61      | M      | OS           | 1                       | 1                | dry, irr, BV, pa, bu                                  | irr         | 1                | 0    | 1                         | 1    | 1                               | 1    |
| CCH-ATD | 1    | 76      | M      | OD           | 4                       | 6                | dry, irr, pa                                          | -           | 1                | 0    | 2                         | 1    | 0                               | 0    |
|         | 2    | 67      | F      | OS           | 3                       | 7                | pa, cr                                                | pa          | 0                | 0    | 2                         | 1    | 0                               | 0    |
|         | 3    | 49      | F      | OS           | 5                       | 6                | irr                                                   | -           | 1                | 0    | 2                         | 1    | 2                               | 2    |
|         | 4    | 69      | F      | OD           | 8                       | 11               | irr, wa, pho                                          | -           | 0                | 0    | 1                         | 1    | 1                               | 1    |
|         | 5    | 70      | F      | OD           | 3                       | 8                | irr, pa, it                                           | -           | 0                | 0    | 1                         | 0    | 0                               | 0    |
|         | 6    | 86      | M      | OS           | 6                       | 8                | wa, bu                                                | -           | 1                | 1    | 1                         | 0    | 1                               | 0    |
|         | 7    | 68      | M      | OS           | 6                       | 10               | irr                                                   | -           | 0                | 0    | 2                         | 1    | 3                               | 2    |
|         | 8    | 92      | F      | OS           | 4                       | 7                | irr                                                   | -           | 0                | 0    | 1                         | 0    | 1                               | 1    |
|         | 9    | 70      | M      | OS           | 7                       | 11               | irr, pa, pho, it                                      | -           | 0                | 0    | 1                         | 0    | 4                               | 2    |
|         | 10   | 65      | F      | OD           | 13                      | 14               | irr, pa, pho, it                                      | -           | 0                | 0    | 1                         | 0    | 4                               | 2    |
|         | 11   | 72      | M      | OD           | 4                       | 6                | dry, wa, bu                                           | -           | 0                | 0    | 1                         | 0    | 3                               | 1    |
|         | 12   | 66      | M      | OS           | 10                      | 11               | dry, wa, bu                                           | -           | 0                | 0    | 1                         | 0    | 3                               | 1    |
|         | 13   | 63      | F      | OS           | 4                       | 7                | irr, pho                                              | pho         | 1                | 0    | 2                         | 1    | 1                               | 1    |
|         |      |         |        | 5            | 8                       | irr, pho         | pho                                                   | 1           | 0                | 2    | 1                         | 1    | 1                               |      |
|         |      |         |        | 5            | 8                       | irr, BV, pa, pho | -                                                     | 0           | 0                | 2    | 1                         | 1    | 1                               |      |
|         |      |         |        | 5            | 8                       | irr, BV, pa, pho | -                                                     | 0           | 0                | 2    | 1                         | 1    | 1                               |      |
|         |      |         |        | 5            | 8                       | dry, pa, bu      | -                                                     | 1           | 0                | 0    | 0                         | 1    | 1                               |      |
|         |      |         |        | 5            | 7                       | dry, pa, bu      | -                                                     | 1           | 0                | 0    | 0                         | 1    | 1                               |      |

The definition of grading is detailed in the text.

Abbreviations: bu: burning sensation; BV: Blurred vision; cr: crusting; dry: dryness; F: Female; fat: ocular fatigue; FU: follow up; irr: irritation; it: itching; L:left; M: Male; mu: mucus formation; pa: pain; pho: photophobia; Post: Post operation; Pre: Pre operation; R: Right; Y: Years; -: negative
